# Supplementary material
Source: ML conference proceedings conference paper supplement (https://openaccess.thecvf.com/content/CVPR2022/html/Dave_SPAct_Self-Supervised_Privacy_CVPR_2022_paper.html)
Supplement: Supplementary file 1 [file Dave_SPAct_Self-Supervised_Privacy_CVPR_2022_supplemental.zip]

Archive with 4 entries (4 files):
- 09379-supp.pdf
- cricketshot_results.mp4
- cello_results.mp4
- benchpress_results.mp4
